# Supplementary material for: Environmental Factors Affecting Diversity, Structure, and Temporal Variation of Airborne Fungal Communities in a Research and Teaching Building of Tianjin University, China
Source: MDPI journal article supplement (doi:10.3390/jof8050431), 2022-04-22
Supplement: s1 [file s1]

# Environmental Factors Affecting Diversity, Structure, and Temporal Variation of Airborne Fungal Communities in a Research and Teaching Building of Tianjin University, China

Yixuan Lu †, Xiao Wang †, Lucineidy C. S. de S. Almeida and Lorenzo Pecoraro \*

School of Pharmaceutical Science and Technology, Tianjin University, 92 Weijin Road, Tianjin 300072, China; luyixuann2022@163.com (Y.L.); wang\_xiao1996@163.com (X.W.); lu.kaili551@gmail.com (L.C.S.d.S.A.)

\* Correspondence: lorenzo.pecoraro@tju.edu.cn

† Co-first author.

**Table S1.** Isolated airborne fungal species and number of strains.

| Fungal species                 | May-20 | June-20 | July-20 | Aug.-20 | Sep.-20 | Oct.-20 | Nov.-20 | Dec.-20 | Jan.-21 | Feb.-21 | Mar.-21 | Apr.-21 | Total |
|--------------------------------|--------|---------|---------|---------|---------|---------|---------|---------|---------|---------|---------|---------|-------|
| <i>Acrostalagmus</i> sp.       |        |         |         |         |         |         |         |         | 1       |         |         |         | 1     |
| <i>Alternaria alternata</i>    | 46     | 28      | 16      | 13      | 5       | 4       | 3       | 12      | 3       | 1       | 4       | 5       | 140   |
| <i>Alternaria arborescens</i>  | 1      |         |         |         |         |         |         |         |         |         |         |         | 1     |
| <i>Alternaria destruens</i>    | 2      |         |         |         |         |         |         |         |         |         |         |         | 2     |
| <i>Alternaria doliconidium</i> | 1      |         |         |         |         |         |         |         |         |         |         |         | 1     |
| <i>Alternaria infectoria</i>   |        |         |         |         | 2       |         |         |         |         |         |         |         | 2     |
| <i>Alternaria longipes</i>     |        |         |         |         |         |         | 1       |         |         |         |         |         | 1     |
| <i>Alternaria pharbitidis</i>  |        | 1       |         |         |         |         |         |         |         |         |         |         | 1     |
| <i>Alternaria quercus</i>      |        |         | 1       |         |         |         |         |         |         |         |         |         | 1     |
| <i>Alternaria</i> sp.          | 3      | 2       | 2       |         | 5       | 1       |         |         | 6       |         | 1       |         | 20    |
| <i>Alternaria tamaricis</i>    |        |         | 1       |         |         |         |         |         |         |         |         |         | 1     |
| <i>Alternaria tenuissima</i>   | 7      | 2       | 17      | 11      | 24      | 6       | 2       |         |         | 2       | 6       | 6       | 83    |
| <i>Arthrinium malaysianum</i>  |        |         |         |         |         |         |         | 1       |         |         |         |         | 1     |
| <i>Arthrinium marii</i>        |        |         |         |         |         |         |         | 2       |         |         |         |         | 2     |

|                                     |   |   |   |   |    |    |   |   |   |   |   |    |
|-------------------------------------|---|---|---|---|----|----|---|---|---|---|---|----|
| <i>Arthrinium phaeospermum</i>      |   |   |   |   |    |    | 1 |   |   |   |   | 1  |
| <i>Arthrinium piptatheri</i>        |   |   |   |   |    |    | 1 |   |   |   |   | 1  |
| <i>Arthrinium saccharicola</i>      |   |   | 1 | 1 |    | 1  | 1 |   |   |   |   | 4  |
| <i>Arthrinium</i> sp.               |   |   |   |   |    | 2  | 1 | 1 | 2 |   |   | 6  |
| <i>Aspergillus awamor</i>           |   |   | 1 |   |    |    |   |   |   |   |   | 1  |
| <i>Aspergillus costaricensis</i>    |   |   |   |   |    | 1  |   |   |   |   |   | 1  |
| <i>Aspergillus niger</i>            | 5 | 4 |   | 1 |    |    | 1 |   | 4 | 1 |   | 16 |
| <i>Aspergillus nomius</i>           | 2 |   |   |   |    |    |   |   |   |   |   | 2  |
| <i>Aspergillus ochraceus</i>        |   |   |   |   |    | 1  |   |   |   |   |   | 1  |
| <i>Aspergillus protuberus</i>       |   |   |   | 1 |    |    | 1 |   |   |   |   | 2  |
| <i>Aspergillus pseudoglaucus</i>    |   |   |   | 1 |    |    |   |   |   |   |   | 1  |
| <i>Aspergillus</i> sp.              |   |   |   |   |    |    |   |   | 2 |   |   | 2  |
| <i>Aspergillus stellatus</i>        |   |   |   |   |    |    |   |   | 1 |   |   | 1  |
| <i>Aspergillus sydowii</i>          |   |   |   |   |    | 1  |   |   |   |   |   | 1  |
| <i>Aspergillus tubingensis</i>      |   |   |   | 2 | 1  |    | 2 |   |   |   |   | 5  |
| <i>Aspergillus versicolor</i>       |   | 1 |   |   |    |    |   |   |   |   | 1 | 2  |
| <i>Aureobasidium melanogenum</i>    |   |   |   | 1 |    |    |   |   |   |   |   | 1  |
| <i>Aureobasidium namibiae</i>       |   |   |   |   |    | 1  |   |   |   |   |   | 1  |
| <i>Aureobasidium proteae</i>        |   |   |   |   |    |    | 1 |   |   |   |   | 1  |
| <i>Aureobasidium pullulans</i>      |   |   |   | 1 | 4  |    |   |   |   |   |   | 5  |
| <i>Aureobasidium</i> sp.            |   | 1 |   |   |    | 2  | 1 |   |   |   |   | 4  |
| <i>Cercospora arctii-ambrosiae</i>  |   |   |   |   |    |    | 1 |   |   |   |   | 1  |
| <i>Cercospora canescens</i>         |   |   |   | 1 |    |    |   |   |   |   |   | 1  |
| <i>Cercospora nicotianae</i>        |   |   |   |   | 2  |    |   | 1 |   |   |   | 3  |
| <i>Cladosporium anthropophilum</i>  |   | 2 | 2 | 1 | 3  |    |   | 1 |   |   |   | 9  |
| <i>Cladosporium sinuosum</i>        |   |   |   |   |    |    |   |   |   |   | 1 | 1  |
| <i>Cladosporium austroafricanum</i> |   |   |   | 1 |    |    | 2 |   |   |   | 1 | 4  |
| <i>Cladosporium cladosporioides</i> | 1 |   |   | 2 | 20 | 12 | 7 | 7 | 6 | 2 | 3 | 62 |
| <i>Cladosporium colombiae</i>       |   |   |   |   |    |    |   |   | 1 |   | 1 | 2  |
| <i>Cladosporium delicatulum</i>     |   | 3 |   |   |    |    |   |   |   |   |   | 3  |
| <i>Cladosporium gossypicola</i>     |   | 2 |   |   |    | 2  |   |   |   |   |   | 4  |

|                                       |   |   |   |   |   |   |   |   |   |   |    |
|---------------------------------------|---|---|---|---|---|---|---|---|---|---|----|
| <i>Cladosporium halotolerans</i>      |   |   |   |   | 1 |   |   |   |   |   | 1  |
| <i>Cladosporium oxysporum</i>         |   |   | 1 |   |   |   |   |   |   |   | 1  |
| <i>Cladosporium ramotenellum</i>      | 2 |   | 1 |   | 2 |   |   | 5 |   | 4 | 14 |
| <i>Cladosporium</i> sp.               |   | 1 | 1 |   | 2 |   | 3 | 9 |   | 2 | 27 |
| <i>Cladosporium sphaerospermum</i>    |   |   |   |   | 1 |   |   |   |   |   | 1  |
| <i>Cladosporium tenuissimum</i>       |   |   | 4 | 1 | 1 | 1 | 3 | 1 | 1 |   | 13 |
| <i>Colletotrichum gloeosporioides</i> |   |   |   |   |   | 1 |   |   |   |   | 1  |
| <i>Coniothyrium pyrinum</i>           |   |   |   |   |   |   | 3 |   |   |   | 3  |
| <i>Coniothyrium</i> sp.               |   |   |   |   | 1 |   |   |   |   |   | 1  |
| <i>Comoclathris</i> sp.               |   |   |   |   |   |   |   |   |   | 1 | 1  |
| <i>Coprinopsis atramentaria</i>       |   |   |   | 1 |   |   | 1 |   |   | 1 | 3  |
| <i>Coniothyrium aleuritis</i>         |   |   |   |   |   |   |   |   |   | 1 | 1  |
| <i>Cryptococcus flavescens</i>        |   |   |   |   |   |   |   | 1 |   |   | 1  |
| <i>Curvularia</i> sp.                 |   |   |   |   | 2 |   |   |   |   |   | 2  |
| <i>Curvularia lunata</i>              |   |   |   |   | 2 |   |   |   |   |   | 2  |
| <i>Curvularia intermedia</i>          |   |   |   |   |   | 1 |   |   |   |   | 1  |
| <i>Curvularia verruculosa</i>         |   |   |   |   | 1 |   |   |   |   |   | 1  |
| <i>Cystobasidium</i> sp.              |   |   |   |   |   |   |   |   |   | 2 | 2  |
| <i>Deniquelata quercina</i>           |   |   |   |   |   |   | 1 |   |   |   | 1  |
| <i>Diaporthe</i> sp.                  |   |   |   |   | 1 |   |   |   |   |   | 1  |
| <i>Diatrype stigma</i>                |   |   |   |   | 1 |   |   |   |   |   | 1  |
| <i>Didymella subherbarum</i>          | 1 |   |   |   |   |   |   |   |   |   | 1  |
| <i>Didymella macrostoma</i>           |   |   |   |   | 1 |   |   |   |   |   | 1  |
| <i>Didymocyrtis brachylaenae</i>      |   |   |   |   |   |   |   |   |   | 1 | 1  |
| <i>Didymella pedeiae</i>              |   |   |   |   |   |   |   |   |   | 2 | 2  |
| <i>Dothiorella gregaria</i>           |   |   |   |   |   |   |   |   |   | 2 | 2  |
| <i>Dothiora europaea</i>              |   |   |   |   |   |   |   |   | 1 |   | 1  |
| <i>Epicoccum nigrum</i>               |   |   |   |   | 1 |   |   | 1 |   |   | 2  |
| <i>Epicoccum layuense</i>             |   |   |   |   |   |   |   |   |   | 1 | 1  |
| <i>Epicoccum</i> sp.                  |   |   |   |   | 1 | 1 |   |   |   |   | 2  |
| <i>Eurotium</i> sp.                   |   |   |   |   |   |   |   | 1 | 1 |   | 3  |

|                                     |   |   |   |   |   |   |   |   |    |
|-------------------------------------|---|---|---|---|---|---|---|---|----|
| <i>Exserohilum rostratum</i>        |   |   | 1 |   |   |   |   |   | 1  |
| <i>Filobasidium magnum</i>          | 1 | 1 | 1 |   | 5 | 1 |   | 2 | 11 |
| <i>Fusarium acetilerea</i>          |   |   | 1 |   |   |   |   |   | 1  |
| <i>Fusarium proliferatum</i>        |   |   |   |   | 1 |   |   |   | 1  |
| <i>Fusarium solani</i>              | 2 |   |   |   |   |   |   |   | 2  |
| <i>Fusarium sp.</i>                 |   |   | 1 |   |   |   |   |   | 1  |
| <i>Fusarium verticillioides</i>     |   |   |   |   | 1 |   |   |   | 1  |
| <i>Geomyces sp.</i>                 |   |   |   | 1 |   | 1 |   |   | 2  |
| <i>Leptospora galii</i>             |   |   |   |   |   |   |   | 1 | 1  |
| <i>Leptosphaeria sp.</i>            |   |   |   |   | 1 |   |   |   | 1  |
| <i>Karstenula sp.</i>               |   |   |   |   |   |   |   | 2 | 2  |
| <i>Naganishia diffluens</i>         |   |   |   |   |   |   |   | 1 | 1  |
| <i>Magnaporthe oryzae</i>           |   |   | 1 |   |   |   |   |   | 1  |
| <i>Massarina igniaria</i>           |   |   |   |   |   | 1 |   |   | 1  |
| <i>Metarhizium anisopliae</i>       |   |   | 1 |   |   |   |   |   | 1  |
| <i>Metschnikowia sp.</i>            |   |   |   |   |   |   | 2 |   | 2  |
| <i>Microdochium bolleyi</i>         |   |   |   |   |   |   | 2 |   | 2  |
| <i>Microsphaeropsis olivacea</i>    | 3 |   |   | 1 | 1 |   |   | 1 | 6  |
| <i>Moesziomyces bullatus</i>        |   |   | 1 |   |   | 1 |   |   | 2  |
| <i>Mucor circinelloides</i>         |   | 5 |   |   |   |   |   |   | 5  |
| <i>Naganishia globosa</i>           | 2 |   |   |   |   |   |   |   | 2  |
| <i>Naganishia uzbekistanensis</i>   |   |   |   |   |   |   |   | 1 | 1  |
| <i>Neurospora sitophila</i>         |   |   |   |   |   | 1 |   |   | 1  |
| <i>Neurospora tetrasperma</i>       |   |   | 2 |   |   |   |   |   | 2  |
| <i>Nigrospora oryzae</i>            |   |   | 3 |   |   |   |   |   | 3  |
| <i>Nigrospora sp.</i>               |   |   | 1 | 1 |   |   |   |   | 2  |
| <i>Nothophoma spiraeae</i>          |   |   |   |   |   |   | 1 |   | 1  |
| <i>Parapyrenochaeta sp.</i>         |   |   |   |   |   |   |   | 1 | 1  |
| <i>Paramyrothecium tellicola</i>    |   |   |   |   |   |   | 1 |   | 1  |
| <i>Penicillium commune</i>          |   |   |   |   |   |   |   | 1 | 1  |
| <i>Penicillium concavorugulosum</i> |   |   |   | 2 |   |   |   |   | 2  |

|                                    |   |   |   |   |   |   |   |    |
|------------------------------------|---|---|---|---|---|---|---|----|
| <i>Penicillium expansum</i>        |   |   | 1 |   |   | 1 |   | 2  |
| <i>Penicillium goetzii</i>         | 1 |   |   |   | 1 |   |   | 2  |
| <i>Penicillium granulatum</i>      |   |   | 2 |   |   |   |   | 2  |
| <i>Penicillium nalgiovense</i>     |   |   | 1 |   |   |   |   | 1  |
| <i>Penicillium oxalicum</i>        |   | 2 | 1 |   | 2 | 1 | 3 | 10 |
| <i>Peniophora pseudoversicolor</i> |   |   |   |   |   |   |   | 1  |
| <i>Periconia</i> sp.               |   | 3 |   |   | 2 |   |   | 4  |
| <i>Periconia lateralis</i>         |   |   |   |   |   |   | 2 | 2  |
| <i>Penicillium</i> sp.             | 1 |   |   | 1 | 1 |   | 3 | 1  |
| <i>Periconia igniaria</i>          |   |   |   |   | 1 |   |   | 1  |
| <i>Periconia sahariana</i>         |   | 1 |   |   |   |   |   | 1  |
| <i>Preussia similis</i>            |   |   |   |   |   |   |   | 1  |
| <i>Periconia variicolor</i>        |   |   |   |   | 1 |   |   | 1  |
| <i>Phaeobotryon negundinis</i>     |   |   |   | 1 |   |   |   | 1  |
| <i>Phaeosphaeria typharum</i>      |   |   |   |   |   |   |   | 1  |
| <i>Phanerochaete chrysosporium</i> |   | 2 |   |   |   |   |   | 2  |
| <i>Phoma macrostoma</i>            | 3 |   |   |   |   |   |   | 3  |
| <i>Phoma medicaginis</i>           | 1 |   |   |   |   |   |   | 1  |
| <i>Phoma medicaginis</i>           |   | 1 |   |   |   |   |   | 1  |
| <i>Phoma</i> sp.                   | 1 |   |   |   | 1 | 1 |   | 3  |
| <i>Pithomyces sacchari</i>         |   | 1 |   |   |   |   |   | 1  |
| <i>Pseudopithomyces chartarum</i>  |   |   |   |   |   |   | 2 | 2  |
| <i>Pyrenochaetopsis confluens</i>  |   |   |   |   |   | 1 |   | 1  |
| <i>Rhizopus</i> sp.                |   |   | 1 |   |   |   |   | 1  |
| <i>Schizothecium inaequale</i>     | 1 |   |   |   |   |   |   | 1  |
| <i>Schizophyllum commune</i>       |   |   |   |   |   |   |   | 1  |
| <i>Scopulariopsis brevicaulis</i>  |   |   | 1 |   |   |   |   | 1  |
| <i>Spegazzinia</i> sp.             |   |   |   | 1 |   |   |   | 1  |
| <i>Sporormiella megalospora</i>    |   |   |   |   |   |   |   | 1  |
| <i>Sporobolomyces carnicolor</i>   |   |   |   |   | 1 |   |   | 1  |
| <i>Stachybotrys chartarum</i>      |   |   |   |   |   | 2 | 1 | 3  |

|                                         |   |   |   |   |   |   |     |
|-----------------------------------------|---|---|---|---|---|---|-----|
| <i>Stagonosporopsis cucurbitacearum</i> |   |   |   |   | 1 |   | 1   |
| <i>Symmetrospora oryicola</i>           |   |   |   |   | 1 |   | 1   |
| <i>Symmetrospora symmetrica</i>         | 1 |   | 1 |   |   |   | 2   |
| <i>Talaromyces amestolkiae</i>          |   |   |   |   | 1 |   | 1   |
| <i>Talaromyces funiculosus</i>          |   |   | 1 | 3 | 2 | 2 | 1 9 |
| <i>Talaromyces radicus</i>              | 2 |   |   |   |   | 1 | 3   |
| <i>Talaromyces</i> sp.                  | 4 |   | 1 | 1 |   |   | 6   |
| <i>Talaromyces purpureogenus</i>        |   |   |   |   |   | 1 | 1   |
| <i>Talaromyces verruculosus</i>         |   | 1 |   | 1 |   |   | 2   |
| <i>Thielavia subthermophila</i>         |   |   |   |   |   |   | 1 1 |
| <i>Torula caligans</i>                  | 2 |   |   |   |   |   | 2   |
| <i>Torula mackenziei</i>                |   |   | 1 |   | 1 | 2 | 4   |
| <i>Torula</i> sp.                       |   |   | 1 |   | 2 |   | 3   |
| <i>Trichoderma</i> sp.                  | 1 |   |   |   |   |   | 1   |
| <i>Trichoderma longibrachiatum</i>      |   |   |   |   |   | 1 | 1   |
| <i>Tricholoma matsutake</i>             | 1 |   |   |   |   |   | 1   |
| <i>Trichurus spiralis</i>               |   |   |   |   | 1 |   | 1   |
| <i>Ustilago levis</i>                   | 1 |   |   |   |   |   | 1   |
| <i>Vishniacozyma</i> sp.                |   |   | 1 |   |   |   | 1   |

**Table S2.** Total number of fungal colonies isolated from each location from May 2020 to April 2021.

| May-20                              |    |          |          |    |          |          |    |    |          |          |       |          |          |    |          |          |    |
|-------------------------------------|----|----------|----------|----|----------|----------|----|----|----------|----------|-------|----------|----------|----|----------|----------|----|
| Fungal species                      | 1F |          | 2F       |    | 3F       |          | 5F |    | 6F       |          | Total |          |          |    |          |          |    |
|                                     | OD | Corridor | Washroom | OD | Corridor | Washroom | CA | OD | Corridor | Washroom | OD    | Corridor | Washroom | OD | Corridor | Washroom |    |
| <i>Alternaria alternata</i>         | 6  | 0        | 5        | 6  | 1        | 3        | 0  | 4  | 1        | 5        | 7     | 0        | 2        | 4  | 2        | 0        | 46 |
| <i>Alternaria tenuissima</i>        | 1  | 0        | 1        | 0  | 1        | 2        | 0  | 0  | 0        | 1        | 1     | 0        | 0        | 0  | 0        | 0        | 7  |
| <i>Alternaria</i> sp.               | 0  | 1        | 1        | 0  | 0        | 0        | 0  | 0  | 0        | 0        | 0     | 0        | 0        | 1  | 0        | 0        | 3  |
| <i>Alternaria arborescens</i>       | 0  | 0        | 1        | 0  | 0        | 0        | 0  | 0  | 0        | 0        | 0     | 0        | 0        | 0  | 0        | 0        | 1  |
| <i>Aspergillus niger</i>            | 0  | 0        |          | 0  | 0        | 0        | 0  | 0  | 0        | 0        | 0     | 0        | 1        | 4  | 0        | 0        | 5  |
| <i>Alternaria doliconidium</i>      |    |          |          |    |          | 1        |    |    |          |          |       |          |          |    |          |          | 1  |
| <i>Alternaria destruens</i>         | 0  |          |          | 0  | 0        | 0        | 0  | 0  | 0        | 1        | 1     | 0        | 0        | 0  | 0        | 0        | 2  |
| <i>Aspergillus nomius</i>           |    |          |          |    |          |          |    | 1  |          |          |       |          | 1        |    |          |          | 2  |
| <i>Microsphaeropsis olivacea</i>    | 1  | 0        |          | 0  | 0        | 0        | 0  | 0  | 1        | 0        | 0     | 1        | 0        | 0  | 0        | 0        | 3  |
| <i>Phoma macrostoma</i>             | 1  |          |          | 0  | 1        | 0        | 0  | 0  | 0        | 0        | 0     | 1        | 0        | 0  | 0        | 0        | 3  |
| <i>Cladosporium ramotenellum</i>    | 0  | 1        |          | 0  | 0        | 0        | 0  | 0  | 0        | 0        | 0     | 1        | 0        | 0  | 0        | 0        | 2  |
| <i>Cladosporium cladosporioides</i> |    |          |          | 1  |          |          |    |    |          |          |       |          |          |    |          |          | 1  |
| <i>Phoma</i> sp.                    |    |          |          |    |          |          |    |    |          | 1        |       |          |          |    |          |          | 1  |
| <i>Didymella subherbarum</i>        |    |          |          |    |          |          |    |    |          | 1        |       |          |          |    |          |          | 1  |
| <i>Phoma medicaginis</i>            |    |          |          |    |          |          |    |    |          | 1        |       |          |          |    |          |          | 1  |
| <i>Naganishia globosa</i>           |    | 1        |          |    |          |          |    | 1  |          |          |       |          |          |    |          |          | 2  |
| <i>Fusarium solani</i>              |    |          |          |    |          |          |    |    |          |          | 1     |          |          |    | 1        |          | 2  |
| Total                               | 9  | 3        | 8        | 7  | 3        | 6        | 0  | 6  | 2        | 10       | 10    | 3        | 4        | 9  | 3        | 0        | 83 |
| Jun-20                              |    |          |          |    |          |          |    |    |          |          |       |          |          |    |          |          |    |
| Fungal species                      | 1F |          | 2F       |    | 3F       |          | 5F |    | 6F       |          | Total |          |          |    |          |          |    |
|                                     | OD | Corridor | Washroom | OD | Corridor | Washroom | CA | OD | Corridor | Washroom | OD    | Corridor | Washroom | OD | Corridor | Washroom |    |
| <i>Alternaria alternata</i>         | 1  | 1        | 1        | 3  | 1        | 1        | 1  | 2  |          | 4        | 2     | 3        | 1        | 7  |          |          | 28 |
| <i>Alternaria tenuissima</i>        |    |          |          |    |          |          |    | 2  |          |          |       |          |          |    |          |          | 2  |
| <i>Alternaria pharbitidis</i>       |    |          |          |    |          |          |    | 1  |          |          |       |          |          |    |          |          | 1  |
| <i>Alternaria</i> sp.               |    |          |          |    |          | 1        |    |    |          |          |       |          | 1        |    |          |          | 2  |
| <i>Aspergillus niger</i>            |    |          |          |    |          |          |    |    |          |          | 4     |          |          |    |          |          | 4  |

|                                |   |   |   |   |   |   |   |   |   |  |   |   |   |   |   |   |   |    |
|--------------------------------|---|---|---|---|---|---|---|---|---|--|---|---|---|---|---|---|---|----|
| <i>Aspergillus versicolor</i>  |   |   |   |   |   |   |   |   |   |  |   |   | 1 |   |   |   |   | 1  |
| <i>Aureobasidium</i> sp.       |   |   |   |   |   |   |   |   |   |  |   |   |   |   | 1 |   |   | 1  |
| <i>Phoma medicaginis</i>       |   |   |   |   |   |   | 1 |   |   |  |   |   |   |   |   |   |   | 1  |
| <i>Cladosporium</i> sp.        |   |   |   |   |   |   |   |   |   |  |   |   |   |   | 1 |   |   | 1  |
| <i>Penicillium goetzii</i>     |   |   |   |   |   |   |   |   | 1 |  |   |   |   |   |   |   |   | 1  |
| <i>Penicillium</i> sp.         |   |   |   |   |   |   |   |   |   |  |   |   |   |   | 1 |   |   | 1  |
| <i>Filobasidium magnum</i>     |   |   |   |   |   |   |   |   | 1 |  |   |   |   |   |   |   |   | 1  |
| <i>Schizothecium inaequale</i> |   |   |   |   |   |   |   |   |   |  |   |   |   | 1 |   |   |   | 1  |
| <i>Tricholoma matsutake</i>    |   |   |   |   |   |   |   | 1 |   |  |   |   |   |   |   |   |   | 1  |
| <i>Mucor circinelloides</i>    |   |   |   |   |   |   |   |   |   |  |   |   | 5 |   |   |   |   | 5  |
| Total                          | 1 | 1 | 1 | 3 | 1 | 2 | 3 | 3 | 4 |  | 9 | 3 | 8 | 4 | 8 | 0 | 0 | 51 |

Jul-20

| Fungal species                     | 1F |          | 2F       |    | 3F       |          | 5F |    | 6F       |          |    |          |          |       |    |    |    |
|------------------------------------|----|----------|----------|----|----------|----------|----|----|----------|----------|----|----------|----------|-------|----|----|----|
|                                    | OD | Corridor | Washroom | OD | Corridor | Washroom | CA | OD | Corridor | Washroom | OD | Corridor | Washroom | Total |    |    |    |
| <i>Alternaria alternata</i>        | 2  |          | 2        |    | 2        |          | 2  | 2  | 1        |          | 1  |          | 1        | 3     | 16 |    |    |
| <i>Alternaria tenuissima</i>       | 2  | 1        | 1        |    | 1        | 3        |    | 3  |          | 1        | 2  |          |          | 1     | 2  | 17 |    |
| <i>Alternaria tamaricis</i>        | 1  |          |          |    |          |          |    |    |          |          |    |          |          |       |    | 1  |    |
| <i>Alternaria quercus</i>          |    |          |          | 1  |          |          |    |    |          |          |    |          |          |       |    | 1  |    |
| <i>Alternaria</i> sp.              |    |          |          |    | 1        |          |    |    |          | 1        |    |          |          |       |    | 2  |    |
| <i>Cladosporium</i> sp.            |    |          |          | 1  |          |          |    |    |          |          |    |          |          |       |    | 1  |    |
| <i>Cladosporium ramotenellum</i>   |    |          |          |    |          |          | 1  |    |          |          |    |          |          |       |    | 1  |    |
| <i>Cladosporium gossypiiicola</i>  |    |          |          | 1  |          |          |    |    |          | 1        |    |          |          |       |    | 2  |    |
| <i>Cladosporium delicatulum</i>    |    |          |          |    |          |          |    | 1  |          | 1        |    |          |          | 1     |    | 3  |    |
| <i>Cladosporium anthropophilum</i> |    |          | 1        |    |          |          |    |    |          |          |    |          |          | 1     |    | 2  |    |
| <i>Cladosporium tenuissimum</i>    |    |          |          |    |          |          | 1  |    |          |          | 2  |          |          | 1     |    | 4  |    |
| <i>Cladosporium oxysporum</i>      |    |          | 1        |    |          |          |    |    |          |          |    |          |          |       |    | 1  |    |
| <i>Filobasidium magnum</i>         |    |          |          |    |          |          |    |    |          |          | 1  |          |          |       |    | 1  |    |
| Total                              | 2  | 4        | 5        | 1  | 3        | 6        | 1  | 6  | 3        | 2        | 2  | 5        | 3        | 7     | 2  | 0  | 52 |

Aug-20

| Fungal species | 1F |  | 2F |  | 3F |  | 5F |  | 6F |  |
|----------------|----|--|----|--|----|--|----|--|----|--|
|----------------|----|--|----|--|----|--|----|--|----|--|



|                                     | ODCorridor |   | Washroom |    | ODCorridor |   | Washroom |   | CA | ODCorridor |   | Washroom |   | ODCorridor |    | Washroom |   | ODCorridor | Washroom |  | Total |
|-------------------------------------|------------|---|----------|----|------------|---|----------|---|----|------------|---|----------|---|------------|----|----------|---|------------|----------|--|-------|
| <i>Alternaria alternata</i>         | 1          |   | 1        |    | 4          |   | 2        |   |    |            |   | 1        |   |            |    | 4        |   |            |          |  | 13    |
| <i>Alternaria tenuissima</i>        | 3          |   |          |    |            |   |          |   | 1  |            |   | 1        |   | 1          |    | 2        |   | 3          |          |  | 11    |
| <i>Aspergillus niger</i>            |            |   |          |    |            |   |          |   |    |            |   |          |   |            |    |          |   | 1          |          |  | 1     |
| <i>Aspergillus tubingensis</i>      | 1          |   |          |    |            |   |          |   |    |            |   | 1        |   |            |    |          |   |            |          |  | 2     |
| <i>Aspergillus awamori</i>          |            |   |          |    |            |   |          |   |    |            |   | 1        |   |            |    |          |   |            |          |  | 1     |
| <i>Aureobasidium pullulans</i>      |            |   |          |    |            |   |          |   | 1  |            |   |          |   |            |    |          |   |            |          |  | 1     |
| <i>Arthrinium saccharicola</i>      |            |   |          |    | 1          |   |          |   |    |            |   |          |   |            |    |          |   |            |          |  | 1     |
| <i>Cladosporium cladosporioides</i> |            |   |          |    |            |   |          |   | 1  |            |   |          |   |            |    |          |   | 1          |          |  | 2     |
| <i>Cladosporium anthropophilum</i>  | 1          |   |          |    | 1          |   |          |   |    |            |   |          |   |            |    |          |   |            |          |  | 2     |
| <i>Cladosporium tenuissimum</i>     |            |   |          |    |            |   |          |   | 1  |            |   |          |   |            |    |          |   |            |          |  | 1     |
| <i>Coprinopsis atramentaria</i>     |            |   |          |    |            |   |          |   |    |            |   |          |   | 1          |    |          |   |            |          |  | 1     |
| <i>Cercospora canescens</i>         |            |   |          |    |            |   |          |   |    |            |   |          |   |            |    | 1        |   |            |          |  | 1     |
| <i>Curvularia verruculosa</i>       |            |   |          |    |            |   |          |   |    |            |   |          |   |            |    | 1        |   |            |          |  | 1     |
| <i>Curvularia lunata</i>            |            |   |          |    |            |   |          | 1 |    |            |   | 1        |   |            |    |          |   |            |          |  | 2     |
| <i>Curvularia</i> sp.               |            |   |          |    | 1          |   |          |   |    |            |   |          |   |            |    |          |   |            |          |  | 2     |
| <i>Diaporthe</i> sp.                | 1          |   |          |    |            |   |          |   |    |            |   |          |   |            |    |          |   |            |          |  | 1     |
| <i>Didymella macrostoma</i>         |            |   |          |    | 1          |   |          |   |    |            |   |          |   |            |    |          |   |            |          |  | 1     |
| <i>Diatrype stigma</i>              |            |   |          |    |            |   |          | 1 |    |            |   |          |   |            |    |          |   |            |          |  | 1     |
| <i>Exserohilum rostratum</i>        |            |   |          |    |            |   |          |   |    |            |   |          |   |            |    | 1        |   |            |          |  | 1     |
| <i>Pithomyces sacchari</i>          |            |   |          |    |            |   |          |   | 1  |            |   |          |   |            |    |          |   |            |          |  | 1     |
| <i>Penicillium oxalicum</i>         |            |   |          |    | 1          |   |          |   |    | 1          |   |          |   |            |    |          |   |            |          |  | 2     |
| <i>Periconia sahariana</i>          |            |   |          |    |            |   |          |   |    |            |   |          |   |            |    | 1        |   |            |          |  | 1     |
| <i>Periconia</i> sp.                |            |   |          |    | 2          |   |          |   |    |            |   |          |   |            |    | 1        |   |            |          |  | 3     |
| <i>Epicoccum</i> sp.                |            |   |          |    | 1          |   |          |   |    |            |   |          |   |            |    |          |   |            |          |  | 1     |
| <i>Magnaporthe oryzae</i>           | 1          |   |          |    |            |   |          |   |    |            |   |          |   |            |    |          |   |            |          |  | 1     |
| <i>Moesziomyces bullatus</i>        |            |   |          |    |            |   |          | 1 |    |            |   |          |   |            |    |          |   |            |          |  | 1     |
| <i>Phanerochaete chrysosporium</i>  | 1          |   |          |    |            |   |          |   | 1  |            |   |          |   |            |    |          |   |            |          |  | 2     |
| <i>Nigrospora</i> sp.               |            |   |          |    |            |   |          |   | 1  | 1          |   |          |   |            |    |          |   |            |          |  | 1     |
| Total                               | 9          | 0 | 2        | 11 | 2          | 2 | 2        | 1 | 7  | 2          | 5 | 0        | 2 | 1          | 10 | 5        | 0 |            |          |  | 59    |





|                                     |    |          |          |    |          |          |    |    |          |          |    |          |          |    |          |          |       |
|-------------------------------------|----|----------|----------|----|----------|----------|----|----|----------|----------|----|----------|----------|----|----------|----------|-------|
| <i>Scopulariopsis brevicaulis</i>   |    |          |          |    |          | 1        |    |    |          |          |    |          |          |    |          |          | 1     |
| <i>Ustilago levis</i>               |    |          |          |    |          |          |    |    |          |          | 1  |          |          |    |          |          | 1     |
| Total                               | 4  | 3        | 1        | 5  | 3        | 3        | 3  | 1  | 1        | 9        | 7  | 3        | 0        | 4  | 7        | 0        | 54    |
|                                     |    |          |          |    |          |          |    |    |          |          |    |          |          |    |          |          |       |
| November 2020                       |    |          |          |    |          |          |    |    |          |          |    |          |          |    |          |          |       |
| Fungal species                      | 1F |          | 2F       |    | 3F       |          | 5F |    | 6F       |          |    |          |          |    |          |          |       |
|                                     | OD | Corridor | Washroom | OD | Corridor | Washroom | CA | OD | Corridor | Washroom | OD | Corridor | Washroom | OD | Corridor | Washroom | Total |
| <i>Alternaria alternata</i>         | 1  |          |          |    |          |          |    |    | 1        |          |    |          | 1        |    |          |          | 3     |
| <i>Alternaria longipes</i>          | 1  |          |          |    |          |          |    |    |          |          |    |          |          |    |          |          | 1     |
| <i>Alternaria tenuissima</i>        |    |          |          |    |          |          |    |    |          |          |    |          | 1        |    | 1        |          | 2     |
| <i>Aspergillus ochraceus</i>        |    | 1        |          |    |          |          |    |    |          |          |    |          |          |    |          |          | 1     |
| <i>Arthrinium</i> sp.               |    |          |          |    | 1        |          |    |    |          |          |    |          |          |    | 1        |          | 2     |
| <i>Arthrinium saccharicola</i>      |    |          |          |    |          |          |    |    |          |          | 1  |          |          |    |          |          | 1     |
| <i>Arthrinium piptatheri</i>        |    |          |          | 1  |          |          |    |    |          |          |    |          |          |    |          |          | 1     |
| <i>Aureobasidium</i> sp.            |    |          |          | 2  |          |          |    |    |          |          |    |          |          |    |          |          | 2     |
| <i>Aureobasidium namibiae</i>       |    |          |          | 1  |          |          |    |    |          |          |    |          |          |    |          |          | 1     |
| <i>Cladosporium cladosporioides</i> |    |          |          | 1  |          |          |    |    |          | 1        | 2  |          |          |    | 3        |          | 7     |
| <i>Cladosporium</i> sp.             | 2  |          |          |    |          |          |    |    |          |          |    |          |          |    | 1        |          | 3     |
| <i>Cladosporium tenuissimum</i>     |    |          |          |    |          |          |    |    |          |          | 1  |          | 2        |    |          |          | 3     |
| <i>Coniothyrium pyrinum</i>         | 1  |          |          |    |          |          |    | 2  |          |          |    |          |          |    |          |          | 3     |
| <i>Coprinopsis atramentaria</i>     |    |          |          |    |          |          |    |    |          |          |    |          | 1        |    |          |          | 1     |
| <i>Fusarium verticillioides</i>     |    |          |          |    | 1        |          |    |    |          |          |    |          |          |    |          |          | 1     |
| <i>Penicillium</i> sp.              |    |          |          |    |          |          |    | 1  |          |          |    |          |          |    |          |          | 1     |
| <i>Penicillium expansum</i>         |    |          |          |    |          |          |    |    |          |          |    |          |          |    | 1        |          | 1     |
| <i>Phaeobotryon negundinis</i>      |    |          |          |    |          |          |    |    | 1        |          |    |          |          |    |          |          | 1     |
| <i>Microsphaeropsis olivacea</i>    |    |          |          | 1  |          |          |    |    |          |          |    |          |          |    |          |          | 1     |
| <i>Neurospora sitophila</i>         |    |          |          |    |          |          |    |    |          |          |    |          |          |    |          | 1        | 1     |
| <i>Torula</i> sp.                   |    |          |          |    |          |          |    |    |          |          |    |          |          |    | 1        |          | 1     |
| <i>Talaromyces funiculosus</i>      |    |          |          |    |          |          |    |    | 1        |          |    |          |          |    |          |          | 1     |
| <i>Torula mackenziei</i>            |    |          |          |    |          |          |    |    |          |          |    | 1        |          |    |          |          | 1     |
| <i>Talaromyces verruculosus</i>     |    |          |          |    |          |          |    |    |          | 1        |    |          |          |    |          |          | 1     |



|                                  |    |   |   |    |   |   |   |    |   |   |   |   |   |   |    |   |   |    |
|----------------------------------|----|---|---|----|---|---|---|----|---|---|---|---|---|---|----|---|---|----|
| <i>Penicillium</i> sp.           | 1  |   |   |    |   |   |   |    |   |   |   |   |   |   |    |   |   | 1  |
| <i>Penicillium oxalicum</i>      |    | 1 |   |    |   |   | 1 |    |   |   |   |   |   |   |    |   |   | 2  |
| <i>Filobasidium magnum</i>       |    |   |   | 1  |   |   |   |    |   |   |   |   |   | 4 |    |   |   | 5  |
| <i>Penicillium goetzii</i>       |    |   |   |    |   |   |   |    |   |   | 1 |   |   |   |    |   |   | 1  |
| <i>Periconia igniaria</i>        |    |   |   |    |   |   | 1 |    |   |   |   |   |   |   |    |   |   | 1  |
| <i>Phoma</i> sp.                 | 1  |   |   |    |   |   |   |    |   |   |   |   |   |   |    |   |   | 1  |
| <i>Moesziomyces bullatus</i>     |    |   |   |    |   |   |   |    |   |   | 1 |   |   |   |    |   |   | 1  |
| <i>Talaromyces funiculosus</i>   | 2  |   |   |    |   |   | 1 |    |   |   |   |   |   |   |    |   |   | 3  |
| <i>Talaromyces</i> sp.           | 1  |   |   |    |   |   |   |    |   |   |   |   |   |   |    |   |   | 1  |
| <i>Talaromyces amestolkiae</i>   | 1  |   |   |    |   |   |   |    |   |   |   |   |   |   |    |   |   | 1  |
| <i>Sporobolomyces carnicolor</i> |    |   |   | 1  |   |   |   |    |   |   |   |   |   |   |    |   |   | 1  |
| Total                            | 14 | 1 | 1 | 15 | 3 | 0 | 1 | 12 | 0 | 0 | 0 | 7 | 0 | 0 | 13 | 5 | 0 | 72 |

January 2021

| Fungal species                      | 1F |          | 2F       |    | 3F       |          | 5F |    | 6F       |          | 0  |          |          |       |
|-------------------------------------|----|----------|----------|----|----------|----------|----|----|----------|----------|----|----------|----------|-------|
|                                     | OD | Corridor | Washroom | OD | Corridor | Washroom | CA | OD | Corridor | Washroom | OD | Corridor | Washroom | Total |
| <i>Alternaria alternata</i>         |    |          | 2        |    |          |          |    | 1  |          |          |    |          |          | 3     |
| <i>Alternaria</i> sp.               | 1  |          | 1        | 2  |          |          | 1  |    |          |          | 1  |          |          | 6     |
| <i>Arthrini</i> sp.                 |    |          |          |    |          | 1        |    |    |          |          |    |          |          | 1     |
| <i>Acrostalagmus</i> sp.            |    |          |          |    |          |          |    |    |          | 1        |    |          |          | 1     |
| <i>Cladosporium cladosporioides</i> |    |          | 3        |    |          | 2        |    | 1  |          |          |    |          |          | 6     |
| <i>Cladosporium anthropophilum</i>  |    |          | 1        |    |          |          |    |    |          |          |    |          |          | 1     |
| <i>Cladosporium tenuissimum</i>     |    |          |          |    |          |          |    | 1  |          |          |    |          |          | 1     |
| <i>Cladosporium colombiae</i>       |    |          | 1        |    |          |          |    |    |          |          |    |          |          | 1     |
| <i>Dothiora europaea</i>            |    |          |          |    |          | 1        |    |    |          |          |    |          |          | 1     |
| <i>Phoma</i> sp.                    | 1  |          |          |    |          |          |    |    |          |          |    |          |          | 1     |
| <i>Geomyces</i> sp.                 |    |          | 1        |    |          |          |    |    |          |          |    |          |          | 1     |
| <i>Eurotium</i> sp.                 | 1  |          |          |    |          |          |    |    |          |          |    |          |          | 1     |
| <i>Penicillium oxalicum</i>         | 1  |          |          |    |          |          |    |    |          |          |    |          |          | 1     |
| <i>Periconia</i> sp.                | 1  |          |          |    |          |          |    |    |          |          |    |          |          | 1     |
| <i>Periconia variicolor</i>         |    |          |          |    |          |          | 1  |    |          |          |    |          |          | 1     |



|                        |   |   |   |   |   |   |   |   |   |   |   |   |   |   |   |   |    |
|------------------------|---|---|---|---|---|---|---|---|---|---|---|---|---|---|---|---|----|
| <i>Penicillium</i> sp. |   |   |   |   |   |   |   |   |   | 1 | 1 |   |   | 1 |   |   | 3  |
| Total                  | 3 | 0 | 1 | 1 | 0 | 0 | 0 | 4 | 0 | 2 | 3 | 1 | 1 | 4 | 0 | 0 | 20 |

#### March 2021

| Fungal species                      | 1F |          | 2F       |    | 3F       |          | 5F |    | 6F       |          |    |          |          |    |          |          | Total |
|-------------------------------------|----|----------|----------|----|----------|----------|----|----|----------|----------|----|----------|----------|----|----------|----------|-------|
|                                     | OD | Corridor | Washroom | OD | Corridor | Washroom | CA | OD | Corridor | Washroom | OD | Corridor | Washroom | OD | Corridor | Washroom | Total |
| <i>Alternaria alternata</i>         | 2  |          |          | 1  |          |          | 1  |    |          |          |    |          |          |    |          |          | 4     |
| <i>Alternaria</i> sp.               |    |          |          |    |          |          |    |    |          |          | 1  |          |          |    |          |          | 1     |
| <i>Alternaria tenuissima</i>        | 1  |          |          | 4  |          |          |    | 1  |          |          |    |          |          |    |          |          | 6     |
| <i>Aspergillus niger</i>            |    |          |          | 1  |          |          |    |    |          |          |    |          |          |    |          |          | 1     |
| <i>Cladosporium cladosporioides</i> |    |          |          |    |          |          |    |    |          |          | 2  |          |          | 1  |          |          | 3     |
| <i>Cladosporium</i> sp.             | 1  |          |          |    |          |          | 1  |    |          |          |    |          |          |    |          |          | 2     |
| <i>Cystobasidium</i> sp.            |    |          |          |    |          | 2        |    |    |          |          |    |          |          |    |          |          | 2     |
| <i>Didymocyrtis brachylaenae</i>    |    |          |          |    |          |          |    |    |          |          |    |          |          | 1  |          |          | 1     |
| <i>Epicoccum layuense</i>           |    |          |          |    |          |          | 1  |    |          |          |    |          |          |    |          |          | 1     |
| <i>Penicillium</i> sp.              |    |          |          |    |          |          |    |    |          |          | 1  |          |          |    |          |          | 1     |
| <i>Penicillium oxalicum</i>         |    |          |          | 1  |          |          |    |    |          |          |    |          | 2        |    |          |          | 3     |
| <i>Periconia lateralis</i>          |    |          |          |    |          | 1        | 1  |    |          |          |    |          |          |    |          |          | 2     |
| <i>Penicillium expansum</i>         |    |          |          | 1  |          |          |    |    |          |          |    |          |          |    |          |          | 1     |
| <i>Pseudopithomyces chartarum</i>   |    |          |          |    |          |          |    |    |          |          |    |          |          |    |          | 2        | 2     |
| <i>Talaromyces funiculosus</i>      | 1  |          |          | 1  |          |          |    |    |          |          |    |          |          |    |          |          | 2     |
| <i>Talaromyces purpureogenus</i>    |    |          |          |    |          |          |    |    |          |          |    |          |          |    |          |          | 1     |
| <i>Talaromyces radicus</i>          |    | 1        |          |    |          |          |    |    |          |          |    |          |          |    |          |          | 1     |
| <i>Trichoderma longibrachiatum</i>  |    |          |          | 1  |          |          |    |    |          |          |    |          |          |    |          |          | 1     |
| <i>Torula mackenziei</i>            |    |          |          |    |          |          | 1  | 1  |          |          |    |          |          |    |          |          | 2     |
| <i>Stachybotrys chartarum</i>       |    |          |          |    |          |          |    |    |          |          |    |          |          | 1  |          |          | 1     |
| Total                               | 3  | 3        | 0        | 5  | 5        | 1        | 3  | 3  | 2        | 1        | 4  | 0        | 2        | 3  | 2        | 0        | 38    |

#### April 2021

| Fungal species | 1F |          | 2F       |    | 3F       |          | 5F |    | 6F       |          |    |          |          |    |          |          | Total |
|----------------|----|----------|----------|----|----------|----------|----|----|----------|----------|----|----------|----------|----|----------|----------|-------|
|                | OD | Corridor | Washroom | OD | Corridor | Washroom | CA | OD | Corridor | Washroom | OD | Corridor | Washroom | OD | Corridor | Washroom | Total |



|                                     |   |   |   |   |     |   |
|-------------------------------------|---|---|---|---|-----|---|
| <i>Alternaria alternata</i>         | 1 |   |   | 1 | 3   | 5 |
| <i>Aspergillus versicolor</i>       | 1 |   |   |   |     | 1 |
| <i>Alternaria tenuissima</i>        |   | 2 |   | 2 | 2   | 6 |
| <i>Cladosporium cladosporioides</i> |   | 1 | 1 |   |     | 2 |
| <i>Cladosporium ramotenellum</i>    | 1 |   | 1 | 1 | 1   | 4 |
| <i>Cladosporium sinuosum</i>        | 1 |   |   |   |     | 1 |
| <i>Cladosporium colombiae</i>       |   |   |   | 1 |     | 1 |
| <i>Cladosporium austroafricanum</i> |   |   |   | 1 |     | 1 |
| <i>Naganishia diffluens</i>         |   |   | 1 |   |     | 1 |
| <i>Coniothyrium aleuritidis</i>     |   |   | 1 |   |     | 1 |
| <i>Coprinopsis atramentaria</i>     |   | 1 |   |   |     | 1 |
| <i>Thielavia subthermophila</i>     |   | 1 |   |   |     | 1 |
| <i>Comoclathris</i> sp.             |   |   | 1 |   |     | 1 |
| <i>Cladosporium</i> sp.             |   | 3 | 3 | 1 |     | 7 |
| <i>Cladosporium tenuissimum</i>     |   |   |   | 1 |     | 1 |
| <i>Didymella pedaeiae</i>           | 2 |   |   |   |     | 2 |
| <i>Dothiorella gregaria</i>         |   | 1 |   |   | 1   | 2 |
| <i>Sporormiella megalospora</i>     |   |   |   |   | 1   | 1 |
| <i>Filobasidium magnum</i>          | 1 |   |   |   | 1   | 2 |
| <i>Eurotium</i> sp.                 |   | 1 |   |   |     | 1 |
| <i>Karstenula</i> sp.               |   |   |   |   | 1 1 | 2 |
| <i>Penicillium oxalicum</i>         | 1 |   |   |   |     | 1 |
| <i>Penicillium</i> sp.              |   |   | 1 |   |     | 1 |
| <i>Preussia similis</i>             |   |   |   |   | 1   | 1 |
| <i>Naganishia uzbekistanensis</i>   |   | 1 |   |   |     | 1 |
| <i>Parapyrenochaeta</i> sp.         |   | 1 |   |   |     | 1 |
| <i>Phaeosphaeria typharum</i>       |   | 1 |   |   |     | 1 |
| <i>Microsphaeropsis olivacea</i>    |   |   |   | 1 |     | 1 |
| <i>Talaromyces funiculosus</i>      |   |   |   |   | 1   | 1 |
| <i>Leptospora galii</i>             |   |   | 1 |   |     | 1 |
| <i>Schizophyllum commune</i>        |   |   | 1 |   |     | 1 |

|                                    |   |   |   |   |   |   |   |   |   |   |   |   |   |   |    |   |    |   |
|------------------------------------|---|---|---|---|---|---|---|---|---|---|---|---|---|---|----|---|----|---|
| <i>Peniophora pseudoversicolor</i> | 1 |   |   |   |   |   |   |   |   |   |   |   |   |   |    |   |    | 1 |
| Total                              | 9 | 0 | 0 | 0 | 5 | 8 | 0 | 5 | 3 | 1 | 4 | 1 | 6 | 3 | 10 | 0 | 55 |   |

F = Floor, OD = Outdoor, CA = Coffee area.

**Table S3.** Environmental factors recorded in each sampling site at the time of sampling.

| Month     | Sampling Sites        | Temperature (°C) | Humidity (%) | Wind speed (m/s) | Air Quality Index |
|-----------|-----------------------|------------------|--------------|------------------|-------------------|
| May 2020  | First floor outdoor   | 30.6             | 44.3         | 5.40             | 64.00             |
|           | First floor corridor  | 26.3             | 54           |                  |                   |
|           | First floor washroom  | 27.3             | 51.8         |                  |                   |
|           | Second floor outdoor  | 32               | 40.2         |                  |                   |
|           | Second floor corridor | 26.8             | 50.6         |                  |                   |
|           | Second floor washroom | 28.2             | 45.1         |                  |                   |
|           | Student coffee area   | 27.2             | 50.6         |                  |                   |
|           | Third floor outdoor   | 28.6             | 45.3         |                  |                   |
|           | Third floor corridor  | 27.2             | 48.9         |                  |                   |
|           | Third floor washroom  | 29.1             | 43.2         |                  |                   |
|           | Fifth floor outdoor   | 29.7             | 43.5         |                  |                   |
|           | Fifth floor corridor  | 28.3             | 45.2         |                  |                   |
|           | Fifth floor washroom  | 30.1             | 43.4         |                  |                   |
|           | Sixth floor outdoor   | 31               | 40           |                  |                   |
|           | Sixth floor corridor  | 33.8             | 38.9         |                  |                   |
| June 2020 | First floor outdoor   | 26.3             | 65.7         | 4.90             | 57.00             |
|           | First floor corridor  | 25.7             | 66           |                  |                   |
|           | First floor washroom  | 25               | 70           |                  |                   |
|           | Second floor outdoor  | 26.5             | 64           |                  |                   |
|           | Second floor corridor | 26.8             | 63.8         |                  |                   |
|           | Second floor washroom | 26.9             | 64.8         |                  |                   |
|           | Student coffee area   | 27               | 62.8         |                  |                   |
|           | Third floor outdoor   | 26.8             | 67.2         |                  |                   |

|           |                       |       |       |      |       |
|-----------|-----------------------|-------|-------|------|-------|
|           | Third floor corridor  | 27.7  | 61.7  |      |       |
|           | Third floor washroom  | 27.4  | 65.4  |      |       |
|           | Fifth floor outdoor   | 27.9  | 64.7  |      |       |
|           | Fifth floor corridor  | 27.6  | 61.5  |      |       |
|           | Fifth floor washroom  | 27.8  | 62.4  |      |       |
|           | Sixth floor outdoor   | 30.9  | 52.9  |      |       |
|           | Sixth floor corridor  | 30.8  | 54.3  |      |       |
| July 2020 | First floor outdoor   | 25.78 | 64.39 | 4.60 | 57.00 |
|           | First floor corridor  | 25.19 | 64.68 |      |       |
|           | First floor washroom  | 24.5  | 68.6  |      |       |
|           | Second floor outdoor  | 25.97 | 62.72 |      |       |
|           | Second floor corridor | 26.26 | 62.52 |      |       |
|           | Second floor washroom | 26.36 | 63.5  |      |       |
|           | Student coffee area   | 26.46 | 61.54 |      |       |
|           | Third floor outdoor   | 26.26 | 65.86 |      |       |
|           | Third floor corridor  | 27.15 | 60.47 |      |       |
|           | Third floor washroom  | 26.85 | 64.09 |      |       |
|           | Fifth floor outdoor   | 27.34 | 63.40 |      |       |
|           | Fifth floor corridor  | 27.04 | 60.27 |      |       |
|           | Fifth floor washroom  | 27.24 | 61.15 |      |       |
|           | Sixth floor outdoor   | 30.28 | 51.84 |      |       |
|           | Sixth floor corridor  | 30.18 | 53.21 |      |       |
|           | First floor outdoor   | 23.7  | 60.2  |      |       |
|           | First floor corridor  | 23.1  | 68.2  |      |       |
|           | First floor washroom  | 22.3  | 73.4  |      |       |
|           | Second floor outdoor  | 23.9  | 66.3  |      |       |

|                |                       |      |      |      |       |
|----------------|-----------------------|------|------|------|-------|
| August 2020    | Second floor corridor | 21.8 | 62.9 | 3.20 | 71.00 |
|                | Second floor washroom | 23.7 | 65.9 |      |       |
|                | Student coffee area   | 21.4 | 62.8 |      |       |
|                | Third floor outdoor   | 23.4 | 66.5 |      |       |
|                | Third floor corridor  | 23.2 | 64.9 |      |       |
|                | Third floor washroom  | 23.3 | 65.8 |      |       |
|                | Fifth floor outdoor   | 24.1 | 61.7 |      |       |
|                | Fifth floor corridor  | 22.8 | 58.6 |      |       |
|                | Fifth floor washroom  | 23.3 | 66.3 |      |       |
|                | Sixth floor outdoor   | 24.0 | 57.5 |      |       |
|                | Sixth floor corridor  | 24.5 | 54.4 |      |       |
| September 2020 | First floor outdoor   | 18   | 57.2 | 5.00 | 67.00 |
|                | First floor corridor  | 18.3 | 61.3 |      |       |
|                | First floor washroom  | 18.1 | 63.3 |      |       |
|                | Second floor outdoor  | 18.1 | 59.2 |      |       |
|                | Second floor corridor | 19.3 | 55.6 |      |       |
|                | Second floor washroom | 18.3 | 60.7 |      |       |
|                | Student coffee area   | 18.1 | 60.2 |      |       |
|                | Third floor outdoor   | 18.4 | 59.5 |      |       |
|                | Third floor corridor  | 18.5 | 58.6 |      |       |
|                | Third floor washroom  | 18.3 | 58.8 |      |       |
|                | Fifth floor outdoor   | 18.2 | 46.8 |      |       |
|                | Fifth floor corridor  | 18.8 | 52.9 |      |       |
|                | Fifth floor washroom  | 18.4 | 52.7 |      |       |
|                | Sixth floor outdoor   | 19.9 | 42   |      |       |
|                | Sixth floor corridor  | 20.4 | 47.1 |      |       |

|               |                       |        |        |      |       |
|---------------|-----------------------|--------|--------|------|-------|
| October 2020  | First floor outdoor   | 14.742 | 54.74  | 3.60 | 72.00 |
|               | First floor corridor  | 14.742 | 48.944 |      |       |
|               | First floor washroom  | 14.742 | 55.062 |      |       |
|               | Second floor outdoor  | 14.742 | 49.266 |      |       |
|               | Second floor corridor | 18.284 | 52.486 |      |       |
|               | Second floor washroom | 23.436 | 64.722 |      |       |
|               | Student coffee area   | 19.572 | 76.958 |      |       |
|               | Third floor outdoor   | 16.03  | 46.368 |      |       |
|               | Third floor corridor  | 25.046 | 51.52  |      |       |
|               | Third floor washroom  | 22.148 | 39.928 |      |       |
|               | Fifth floor outdoor   | 16.03  | 42.182 |      |       |
|               | Fifth floor Corridor  | 21.182 | 66.01  |      |       |
|               | Fifth floor Washroom  | 26.334 | 65.366 |      |       |
|               | Sixth floor outdoor   | 29.2   | 45.402 |      |       |
|               | Sixth floor corridor  | 21.826 | 33.166 |      |       |
| November 2021 | First floor outdoor   | 4.1    | 36.5   | 3.20 | 29.00 |
|               | First floor corridor  | 4.1    | 37     |      |       |
|               | First floor washroom  | 4.1    | 37.1   |      |       |
|               | Second floor outdoor  | 4.1    | 37.1   |      |       |
|               | Second floor corridor | 8.1    | 37.5   |      |       |
|               | Second floor washroom | 14.6   | 22.6   |      |       |
|               | Student coffee area   | 14.2   | 26.6   |      |       |
|               | Third floor outdoor   | 6.8    | 32.8   |      |       |
|               | Third floor corridor  | 12.6   | 29.5   |      |       |
|               | Third floor washroom  | 16.3   | 26.1   |      |       |
|               | Fifth floor outdoor   | 6.3    | 34.8   |      |       |

|               |                       |      |      |      |       |
|---------------|-----------------------|------|------|------|-------|
|               | Fifth floor corridor  | 13.8 | 24.4 |      |       |
|               | Fifth floor washroom  | 16.2 | 24.3 |      |       |
|               | Sixth floor outdoor   | 7.1  | 31.7 |      |       |
|               | Sixth floor corridor  | 10.3 | 36.5 |      |       |
| December 2021 | First floor outdoor   | 1.1  | 25.8 | 3.50 | 63.00 |
|               | First floor corridor  | 3    | 25   |      |       |
|               | First floor washroom  | 4.6  | 14.8 |      |       |
|               | Second floor outdoor  | 1.4  | 24.7 |      |       |
|               | Second floor corridor | 11.4 | 14.6 |      |       |
|               | Second floor washroom | 14.3 | 20.6 |      |       |
|               | Student coffee area   | 13.1 | 12.9 |      |       |
|               | Third floor outdoor   | 3.7  | 18.8 |      |       |
|               | Third floor corridor  | 14.8 | 11.7 |      |       |
|               | Third floor washroom  | 16.2 | 11.1 |      |       |
|               | Fifth floor outdoor   | 3.8  | 21.9 |      |       |
|               | Fifth floor corridor  | 15.1 | 25.1 |      |       |
|               | Fifth floor washroom  | 14.9 | 26   |      |       |
|               | Sixth floor outdoor   | 1.6  | 24.2 |      |       |
|               | Sixth floor corridor  | 7.8  | 16.9 |      |       |
| January 2021  | First floor outdoor   | 2.6  | 23.7 | 1.30 | 65.00 |
|               | First floor Corridor  | 8.4  | 21.9 |      |       |
|               | First floor washroom  | 9.5  | 23.1 |      |       |
|               | Second floor outdoor  | 2.9  | 24.2 |      |       |
|               | Second floor corridor | 13   | 16   |      |       |
|               | Second floor washroom | 11.7 | 20.9 |      |       |
|               | Student coffee area   | 15.4 | 17.9 |      |       |

|               |                       |      |      |      |       |
|---------------|-----------------------|------|------|------|-------|
|               | Third floor outdoor   | 3.8  | 22.9 |      |       |
|               | Third floor corridor  | 15.3 | 17   |      |       |
|               | Third floor washroom  | 16   | 16   |      |       |
|               | Fifth floor outdoor   | 3.2  | 23.4 |      |       |
|               | Fifth floor corridor  | 14.2 | 15.3 |      |       |
|               | Fifth floor washroom  | 16   | 17.2 |      |       |
|               | Sixth floor outdoor   | 11.0 | 18   |      |       |
|               | Sixth floor corridor  | 5.3  | 20   |      |       |
| February 2021 | First floor outdoor   | 6.1  | 82   | 1.50 | 47.00 |
|               | First floor corridor  | 10.3 | 45.9 |      |       |
|               | First floor washroom  | 10.6 | 44   |      |       |
|               | Second floor outdoor  | 5.7  | 67   |      |       |
|               | Second floor corridor | 9.9  | 48   |      |       |
|               | Second floor washroom | 10.1 | 50   |      |       |
|               | Student coffee area   | 9.9  | 45.2 |      |       |
|               | Third floor outdoor   | 6.7  | 59   |      |       |
|               | Third floor corridor  | 11.3 | 36.2 |      |       |
|               | Third floor washroom  | 10.7 | 46   |      |       |
|               | Fifth floor outdoor   | 5.8  | 77.4 |      |       |
|               | Fifth floor corridor  | 10.4 | 43.7 |      |       |
|               | Fifth floor washroom  | 10.5 | 40   |      |       |
|               | Sixth floor outdoor   | 5.6  | 77.3 |      |       |
|               | Sixth floor corridor  | 10.6 | 41.5 |      |       |
|               | First floor outdoor   | 8.6  | 41.8 |      |       |
|               | First floor corridor  | 9.8  | 38.9 |      |       |
|               | First floor washroom  | 10.5 | 41.7 |      |       |



|            |                       |      |      |      |       |
|------------|-----------------------|------|------|------|-------|
| March 2021 | Second floor outdoor  | 8.9  | 40.2 | 3.40 | 90.00 |
|            | Second floor corridor | 10.7 | 33.9 |      |       |
|            | Second floor washroom | 10.7 | 34.7 |      |       |
|            | Student coffee area   | 10.3 | 36.2 |      |       |
|            | Third floor outdoor   | 9.9  | 36.2 |      |       |
|            | Third floor corridor  | 11.9 | 30.4 |      |       |
|            | Third floor washroom  | 11.9 | 33.6 |      |       |
|            | Fifth floor outdoor   | 10.3 | 35.5 |      |       |
|            | Fifth floor corridor  | 11.3 | 31.8 |      |       |
|            | Fifth floor washroom  | 11.5 | 32.4 |      |       |
|            | Sixth floor outdoor   | 10   | 32.6 |      |       |
|            | Sixth floor corridor  | 11.6 | 32   |      |       |
| April 2021 | First floor outdoor   | 15.1 | 70.2 | 3.50 | 70.00 |
|            | First floor corridor  | 16.4 | 65.6 |      |       |
|            | First floor washroom  | 17.7 | 64.2 |      |       |
|            | Second floor outdoor  | 16.1 | 66.6 |      |       |
|            | Second floor corridor | 19   | 56.6 |      |       |
|            | Second floor washroom | 17.6 | 61.6 |      |       |
|            | Student coffee area   | 19.5 | 53.9 |      |       |
|            | Third floor outdoor   | 15.5 | 68.2 |      |       |
|            | Third floor corridor  | 18.1 | 60.2 |      |       |
|            | Third floor washroom  | 18.7 | 58.6 |      |       |
|            | Fifth floor outdoor   | 12.5 | 70.8 |      |       |
|            | Fifth floor corridor  | 14.1 | 57.4 |      |       |
|            | Fifth floor washroom  | 21.2 | 50.3 |      |       |
|            | Sixth floor outdoor   | 12.4 | 73   |      |       |

|  |                      |      |      |  |  |
|--|----------------------|------|------|--|--|
|  | Sixth floor corridor | 14.6 | 54.6 |  |  |
|--|----------------------|------|------|--|--|

**Table S4. Correlation analysis between fungal abundance and environmental parameters.**

| <b>Fungal Genera</b> | <b>Factor</b>     | <b>r</b>     | <b>p-value</b> |
|----------------------|-------------------|--------------|----------------|
| <i>Alternaria</i>    | Relative humidity | 0.226959253  | 0.0021851      |
| <i>Arthrinium</i>    | Relative humidity | -0.166102792 | 0.025848443    |
| <i>Aspergillus</i>   | Relative humidity | 0.123018591  | 0.099923553    |
| <i>Aureobasidium</i> | Relative humidity | -0.021899049 | 0.770443599    |
| <i>Cladosporium</i>  | Relative humidity | 0.010135138  | 0.892585546    |
| <i>Filobasidium</i>  | Relative humidity | -0.020328471 | 0.786496421    |
| <i>Penicillium</i>   | Relative humidity | -0.050647368 | 0.499545325    |
| <i>Phoma</i>         | Relative humidity | -0.053211422 | 0.478054348    |
| <i>Talaromyces</i>   | Relative humidity | -0.218006116 | 0.003282896    |
| <i>Torula</i>        | Relative humidity | -0.167355753 | 0.024734031    |
| <i>Alternaria</i>    | Temperature       | 0.417569296  | 5.48037E-09    |
| <i>Arthrinium</i>    | Temperature       | -0.313949484 | 1.77274E-05    |
| <i>Aspergillus</i>   | Temperature       | -0.072864399 | 0.331020314    |
| <i>Aureobasidium</i> | Temperature       | -0.063003142 | 0.400783826    |
| <i>Cladosporium</i>  | Temperature       | -0.092288379 | 0.217880398    |
| <i>Filobasidium</i>  | Temperature       | -0.074759049 | 0.318567096    |
| <i>Penicillium</i>   | Temperature       | -0.205390172 | 0.005675683    |
| <i>Phoma</i>         | Temperature       | 0.113599094  | 0.128915279    |
| <i>Talaromyces</i>   | Temperature       | -0.29789416  | 4.87746E-05    |
| <i>Torula</i>        | Temperature       | -0.16035195  | 0.031532016    |

**Table S5. Relative abundances of top ten genera in five sampling floors.**

| <b>Floor</b> | <b>Phylum</b> | <b>Class</b>    | <b>Genus</b>         | <b>Relative abundance (%)</b> |
|--------------|---------------|-----------------|----------------------|-------------------------------|
| 1F           | Ascomycota    | Dothideomycetes | <i>Alternaria</i>    | 54.36893204                   |
| 1F           | Ascomycota    | Dothideomycetes | <i>Cladosporium</i>  | 15.53398058                   |
| 1F           | Ascomycota    | Eurotiomycetes  | <i>Aspergillus</i>   | 8.737864078                   |
| 1F           | Ascomycota    | Eurotiomycetes  | <i>Penicillium</i>   | 4.854368932                   |
| 1F           | Ascomycota    | Eurotiomycetes  | <i>Talaromyces</i>   | 8.737864078                   |
| 1F           | Ascomycota    | Sordariomycetes | <i>Arthrinium</i>    | 2.912621359                   |
| 1F           | Ascomycota    | Dothideomycetes | <i>Aureobasidium</i> | 1.941747573                   |
| 1F           | Basidiomycota | Tremellomycetes | <i>Filobasidium</i>  | 0.970873786                   |
| 1F           | Ascomycota    | Dothideomycetes | <i>Periconia</i>     | 0.970873786                   |
| 1F           | Ascomycota    | Dothideomycetes | <i>Torula</i>        | 0.970873786                   |
| 2F           | Ascomycota    | Dothideomycetes | <i>Alternaria</i>    | 48.09160305                   |
| 2F           | Ascomycota    | Dothideomycetes | <i>Cladosporium</i>  | 28.24427481                   |
| 2F           | Ascomycota    | Eurotiomycetes  | <i>Aspergillus</i>   | 4.580152672                   |
| 2F           | Ascomycota    | Eurotiomycetes  | <i>Penicillium</i>   | 5.34351145                    |
| 2F           | Ascomycota    | Eurotiomycetes  | <i>Talaromyces</i>   | 1.526717557                   |
| 2F           | Ascomycota    | Sordariomycetes | <i>Arthrinium</i>    | 2.290076336                   |
| 2F           | Ascomycota    | Dothideomycetes | <i>Aureobasidium</i> | 3.053435115                   |
| 2F           | Basidiomycota | Tremellomycetes | <i>Filobasidium</i>  | 1.526717557                   |
| 2F           | Ascomycota    | Dothideomycetes | <i>Periconia</i>     | 2.290076336                   |
| 2F           | Ascomycota    | Dothideomycetes | <i>Torula</i>        | 3.053435115                   |
| 3F           | Ascomycota    | Dothideomycetes | <i>Alternaria</i>    | 44.33962264                   |
| 3F           | Ascomycota    | Dothideomycetes | <i>Cladosporium</i>  | 24.52830189                   |
| 3F           | Ascomycota    | Eurotiomycetes  | <i>Aspergillus</i>   | 3.773584906                   |
| 3F           | Ascomycota    | Eurotiomycetes  | <i>Penicillium</i>   | 5.660377358                   |

| Floor | Phylum        | Class           | Genus                | Relative abundance (%) |
|-------|---------------|-----------------|----------------------|------------------------|
| 3F    | Ascomycota    | Eurotiomycetes  | <i>Talaromyces</i>   | 8.490566038            |
| 3F    | Ascomycota    | Sordariomycetes | <i>Arthrinium</i>    | 3.773584906            |
| 3F    | Ascomycota    | Dothideomycetes | <i>Aureobasidium</i> | 4.716981132            |
| 3F    | Basidiomycota | Tremellomycetes | <i>Filobasidium</i>  | 0.943396226            |
| 3F    | Ascomycota    | Dothideomycetes | <i>Periconia</i>     | 2.830188679            |
| 3F    | Ascomycota    | Dothideomycetes | <i>Torula</i>        | 0.943396226            |
| 5F    | Ascomycota    | Dothideomycetes | <i>Alternaria</i>    | 43.61702128            |
| 5F    | Ascomycota    | Dothideomycetes | <i>Cladosporium</i>  | 31.91489362            |
| 5F    | Ascomycota    | Eurotiomycetes  | <i>Aspergillus</i>   | 9.574468085            |
| 5F    | Ascomycota    | Eurotiomycetes  | <i>Penicillium</i>   | 8.510638298            |
| 5F    | Ascomycota    | Eurotiomycetes  | <i>Talaromyces</i>   | 1.063829787            |
| 5F    | Ascomycota    | Sordariomycetes | <i>Arthrinium</i>    | 2.127659574            |
| 5F    | Ascomycota    | Dothideomycetes | <i>Aureobasidium</i> | 0                      |
| 5F    | Basidiomycota | Tremellomycetes | <i>Filobasidium</i>  | 1.063829787            |
| 5F    | Ascomycota    | Dothideomycetes | <i>Periconia</i>     | 1.063829787            |
| 5F    | Ascomycota    | Dothideomycetes | <i>Torula</i>        | 1.063829787            |
| 6F    | Ascomycota    | Dothideomycetes | <i>Alternaria</i>    | 45.09803922            |
| 6F    | Ascomycota    | Dothideomycetes | <i>Cladosporium</i>  | 32.35294118            |
| 6F    | Ascomycota    | Eurotiomycetes  | <i>Aspergillus</i>   | 6.862745098            |
| 6F    | Ascomycota    | Eurotiomycetes  | <i>Penicillium</i>   | 1.960784314            |
| 6F    | Ascomycota    | Eurotiomycetes  | <i>Talaromyces</i>   | 0.980392157            |
| 6F    | Ascomycota    | Sordariomycetes | <i>Arthrinium</i>    | 2.941176471            |
| 6F    | Ascomycota    | Dothideomycetes | <i>Aureobasidium</i> | 0.980392157            |
| 6F    | Basidiomycota | Tremellomycetes | <i>Filobasidium</i>  | 5.882352941            |
| 6F    | Ascomycota    | Dothideomycetes | <i>Periconia</i>     | 0.980392157            |

---

|    |            |                 |               |             |
|----|------------|-----------------|---------------|-------------|
| 6F | Ascomycota | Dothideomycetes | <i>Torula</i> | 1.960784314 |
|----|------------|-----------------|---------------|-------------|

---
